# Supplementary material for: Electronic and structural characterisation of polycrystalline platinum disulfide thin films
Source: Royal Society of Chemistry journal article supplement (doi:10.1039/d0ra07405e), 2020-01-01
Supplement: d0ra07405e1.pdf [file d0ra07405e1.pdf]

## Supporting Information

# Electronic and structural characterisation of polycrystalline platinum disulfide thin films

*Kuanysh Zhussupbekov<sup>1,2,†</sup>, Conor P. Cullen<sup>2,3</sup>, Ainur Zhussupbekova<sup>1,2</sup>, Igor V. Shvets<sup>1,2</sup>, Georg S. Duesberg<sup>4</sup>, Niall McEvoy<sup>2,3#</sup> and Cormac Ó Coileáin<sup>2,3§</sup>*

<sup>1</sup> School of Physics, Trinity College Dublin, Dublin 2, Ireland

<sup>2</sup> AMBER Centre, CRANN Institute, Trinity College Dublin, Dublin 2, Ireland

<sup>3</sup> School of Chemistry, Trinity College Dublin, Dublin 2, D02 PN40, Ireland

<sup>4</sup> Institute of Physics, EIT 2, Faculty of Electrical Engineering and Information Technology, Universität der Bundeswehr, München 85579 Neubiberg, Germany

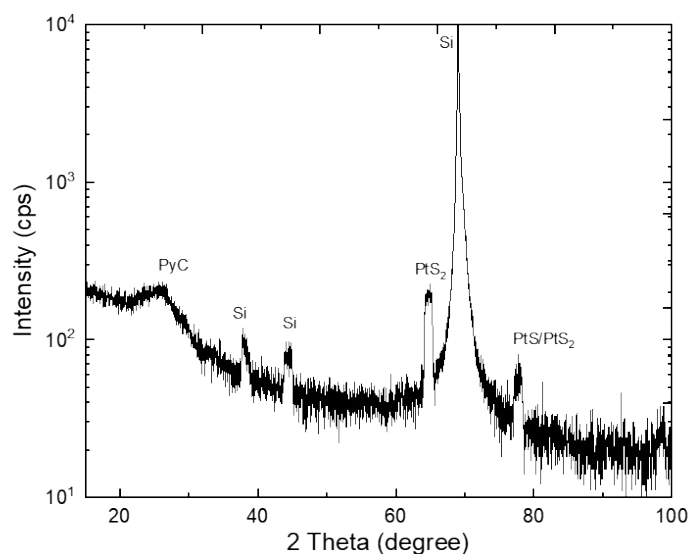

Figure S1: XRD of polycrystalline thin-film PtS<sub>2</sub> on PyC/SiO<sub>2</sub>/Si substrate

As the PtS<sub>2</sub> was thin (initial thickness of 2nm Pt) the signal was quite weak, thus the XRD spectra was acquired by a 14 hour scan. Two peaks associated with Pt compounds can be distinguished: One more intense at ~63° attributable PtS<sub>2</sub> (103) and second less intense at ~78° which is likely a convolution of contributions from PtS<sub>2</sub> and PtS. The peaks associated with the Si substrate and conductive PyC layer are also evident. The peaks also indicate a degree of preferential orientation of the polycrystalline film, supported by the STM observations of the PtS<sub>2</sub>.
